# Supplementary material
Source: PubMed Central journal article supplement (PMC3593879)
Supplement: 1300769110_pnas.201300769SI.pdf [file 1300769110_pnas.201300769SI.pdf]

# Supporting Information

Kim et al. 10.1073/pnas.1300769110

## SI Results

*RNAi* of *pop-1* (*posterior pharynx defect 1*) and *apr-1* (*adenomatous polyposis coli-related 1*), which are thought to be downstream Wingless/int (Wnt)/ $\beta$ -catenin-related signaling factors, resulted in fully penetrant embryonic lethality but had no effect on WRM-1 (Worm armadillo 1) cortical release (Fig. S1 *A* and *F*). However, in both mutants, WRM-1 nuclear accumulation was significantly reduced (Fig. S2 *A* and *G*), suggesting that these factors promote the nuclear accumulation of WRM-1 downstream of its cortical release. Especially in *apr-1(RNAi)*, as previously observed (1), the nuclear WRM-1 levels were globally reduced in all cells in the two-, four-, and eight-cell stages, suggesting a general role for APR-1 in WRM-1 nuclear accumulation (Fig. S2 *A*). In post-embryonic cells, WRM-1 accumulates in both nuclei of T daughter

cells after it is released from the posterior cortex in *apr-1* mutants (2); therefore, APR-1 may have opposite function in terms of nuclear retention of WRM-1 in the endomesoderm (EMS) blastomere and T cells.

*RNAi* of *glycogen synthase kinase 3* (*gsk-3*) causes cortical retention of WRM-1 as in other upstream Wnt signaling mutants (Fig. 1 *C*). However, the interpretation of this phenotype is complicated by the fact that *gsk-3(RNAi)* or *gsk-3* deletion allele (*nr2047*) causes an ectopic stabilization of the Oocyte maturation defective 1 gene product, OMA-1 (3). Because WRM-1 is retained on the EMS cortex when OMA-1 is misregulated (Figs. S1 *D* and *F* and S2 *D* and *G*), we cannot exclude the possibility that cortical regulation of WRM-1 by GSK-3 is indirect through stabilized OMA-1 without additional analysis.

1. Nakamura K, et al. (2005) Wnt signaling drives WRM-1/beta-catenin asymmetries in early *C. elegans* embryos. *Genes Dev* 19(15):1749–1754.
2. Mizumoto K, Sawa H (2007) Cortical beta-catenin and APC regulate asymmetric nuclear beta-catenin localization during asymmetric cell division in *C. elegans*. *Dev Cell* 12(2):287–299.
3. Shirayama M, et al. (2006) The conserved kinases CDK-1, GSK-3, KIN-19, and MBK-2 promote OMA-1 destruction to regulate the oocyte-to-embryo transition in *C. elegans*. *Curr Biol* 16(1):47–55.





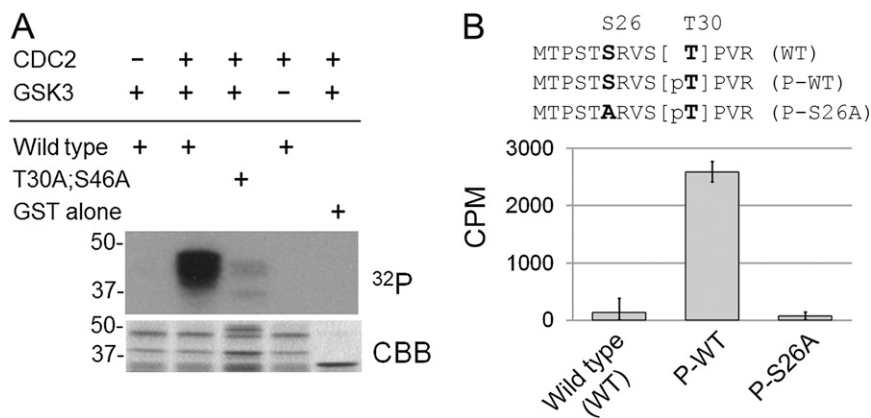

**Fig. 53.** Sequential phosphorylation of WRM-1 by CDK-1 and GSK-3. (A) WT [GST-WRM-1(1-140)], T30A;S46A [GST-WRM-1(1-140) with CDK-phosphoacceptor mutations], or GST alone were incubated first with nonradiolabeled ATP in the presence or absence of human CDC2/cyclin B complex (indicated by CDC2 + or -). After extensive washing, substrates were incubated with  $\gamma$ - $^{32}\text{P}$ ATP in the presence or absence of vertebrate GSK3 $\beta$  (indicated by GSK3 + or -). Substrates were fractionated by SDS/PAGE and stained with Coomassie Brilliant Blue (CBB). Autoradiography was performed to detect phosphorylation products ( $^{32}\text{P}$ ). (B) Recombinant *Caenorhabditis elegans* GSK-3 was used to phosphorylate synthetic WRM-1 peptides encompassing the conserved GSK-3 (S26) and CDK-1(T30) phosphoacceptor sites as indicated with (P-WT) or without (WT) the priming phosphorylation at T30 and with a Ser to Ala mutation at S26 in addition to the priming phosphorylation at T30 (P-S26A).

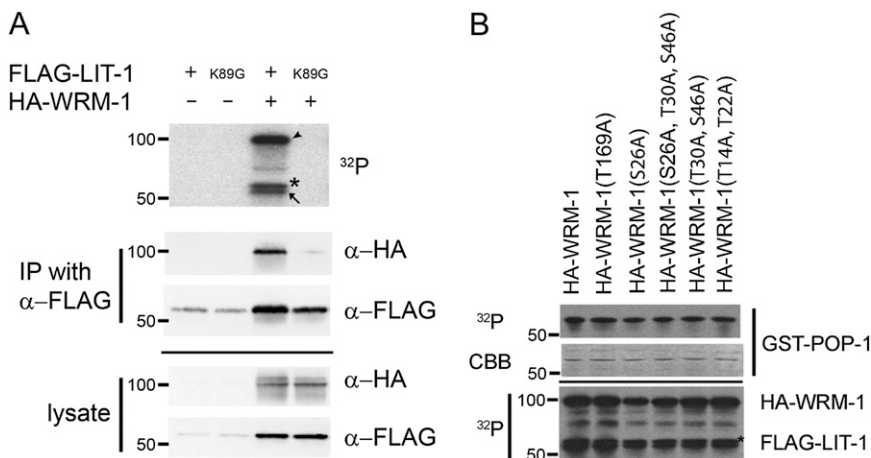

**Fig. 54.** In vitro LIT-1/WRM-1 kinase assays. (A) 293T cells were transfected with FLAG-LIT-1 WT (+) or catalytic mutant (K89G) expression plasmid with or without HA-WRM-1 expression plasmid (+ or -, respectively). FLAG-LIT-1/HA-WRM-1 complexes were immunoprecipitated with  $\alpha$ -FLAG M2-agarose beads and assayed for in vitro kinase activity against GST-POP-1(1-188) proteins (*Top*;  $^{32}\text{P}$ ). The immunoprecipitates (*Middle*; IP with  $\alpha$ -FLAG) and lysates (*Bottom*; lysate) were analyzed by Western blotting using  $\alpha$ -HA or  $\alpha$ -FLAG antibodies as indicated. As reported previously (1), FLAG-LIT-1 alone is an inactive kinase, whereas the FLAG-LIT-1/HA-WRM-1 complex is an active complex that specifically phosphorylates WRM-1 (indicated by the black arrowhead), LIT-1 (indicated by the black arrow), and GST-POP-1 (indicated by the asterisk). The FLAG-LIT-1 catalytic mutant (K89G) does not form a stable complex with WRM-1. (B) 293T cells were transfected with FLAG-LIT-1 and HA-WRM-1 expression plasmids harboring various mutations affecting phosphorylation sites for GSK-3 (S26), CDK-1 (T30, S46), and potential MAPK sites (T14, T22, and T169). FLAG-LIT-1/HA-WRM-1 complexes were immunoprecipitated with  $\alpha$ -FLAG M2-agarose beads and assayed for in vitro kinase activity against GST-POP-1 as in A. Phosphorylated GST-POP-1 protein was recovered from the kinase reactions using glutathione beads and analyzed by SDS/PAGE followed by CBB staining (*Middle*) and autoradiography (*Top*;  $^{32}\text{P}$ ).  $\alpha$ -FLAG immunoprecipitates were analyzed for HA-WRM-1 and FLAG-LIT-1 complex formation and autophosphorylation (*Bottom*;  $^{32}\text{P}$ ). Asterisk indicates carry over GST-POP-1 protein. The formation of the FLAG-LIT-1/HA-WRM-1 complex and its kinase activity was not affected by any of the mutations in WRM-1 that were tested.

1. Rocheleau CE, et al. (1999) WRM-1 activates the LIT-1 protein kinase to transduce anterior/posterior polarity signals in *C. elegans*. *Cell* 97(6):717-726.



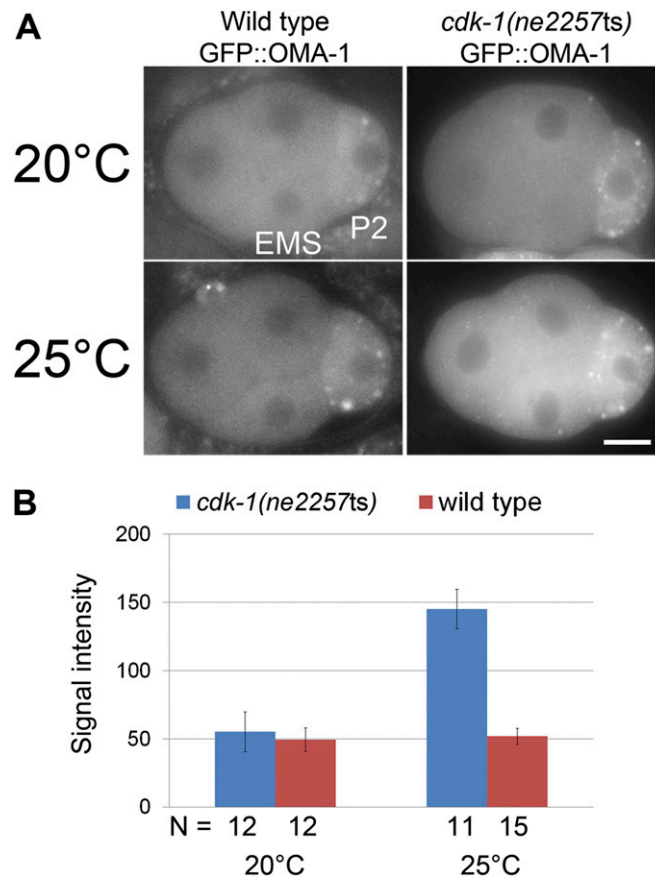

**Fig. S5.** OMA-1 protein level in four-cell *cdk-1(ne2257ts)* embryos. (A) Fluorescence micrographs of representative WT and *cdk-1(ne2257ts)* four-cell embryos expressing a *gfp::oma-1* transgene (gift from R. Lin) at the nonpermissive temperature (25 °C) or semipermissive temperature (20 °C). Anterior is to the left, and dorsal is up. (Scale bar: 10 μm.) (B) Quantification of OMA-1::GFP level was performed using ImageJ software. N, number of embryos scored. Error bars indicate SD.

**Table S1. Cortical WRM-1 perturbs proper EMS division orientation**

| Embryo type                                                                       | A (%) | B (%) | C (%) | Total N |
|-----------------------------------------------------------------------------------|-------|-------|-------|---------|
| <i>src-1(RNAi)</i>                                                                | 73.8  | 16.5  | 9.7   | 115     |
| <i>mes-1(bn74)</i>                                                                | 100.0 | 0.0   | 0.0   | 9       |
| <i>mom-2(RNAi)</i>                                                                | 95.5  | 4.5   | 0.0   | 22      |
| <i>mom-2(ne834ts)</i>                                                             | 100.0 | 0.0   | 0.0   | 20      |
| <i>mom-5(RNAi)</i>                                                                | 94.6  | 2.7   | 2.7   | 37      |
| <i>mom-4(ne1539ts)</i>                                                            | 100.0 | 0.0   | 0.0   | 10      |
| <i>lit-1(RNAi)</i>                                                                | 100.0 | 0.0   | 0.0   | 18      |
| <i>lit-1(ne1991ts)</i>                                                            | 100.0 | 0.0   | 0.0   | 23      |
| <i>wrm-1(RNAi)</i>                                                                | 100.0 | 0.0   | 0.0   | 47      |
| <i>cdk-1(ne2257ts)</i>                                                            | 95.7  | 4.3   | 0.0   | 68      |
| <i>cdk-1(ne2257ts); src-1(RNAi)</i>                                               | 15.6  | 20.0  | 64.4  | 90      |
| <i>cdk-1(ne2257ts); mom-2(RNAi)</i>                                               | 100.0 | 0.0   | 0.0   | 22      |
| <i>cdk-1(ne2257ts); mom-5(RNAi)</i>                                               | 100.0 | 0.0   | 0.0   | 15      |
| <i>cdk-1(ne2257ts); src-1(RNAi); lit-1(RNAi)</i>                                  | 76.5  | 5.9   | 17.6  | 34      |
| <i>cdk-1(ne2257ts); src-1(RNAi); wrm-1(RNAi)</i>                                  | 81.5  | 11.1  | 7.4   | 27      |
| <i>flag::wrm-1; wrm-1(tm514)</i>                                                  | 100.0 | 0.0   | 0.0   | 45      |
| <i>flag::wrm-1; wrm-1(tm514); mom-4(ne1539ts)</i>                                 | 100.0 | 0.0   | 0.0   | 37      |
| <i>flag::wrm-1; wrm-1(tm514); src-1(RNAi)</i>                                     | 76.0  | 22.0  | 2.0   | 76      |
| <i>flag::wrm-1; wrm-1(tm514); src-1(RNAi); mom-4(ne1539ts)</i>                    | 74.2  | 16.1  | 9.7   | 31      |
| <i>flag::wrm-1; wrm-1(tm514); src-1(RNAi); wrm-1(RNAi)</i>                        | 71.9  | 28.1  | 0.0   | 32      |
| <i>flag::wrm-1<sub>T30AS46A</sub>; wrm-1(tm514)</i>                               | 100.0 | 0.0   | 0.0   | 46      |
| <i>flag::wrm-1<sub>T30AS46A</sub>; wrm-1(tm514); mom-4(ne1539ts)</i>              | 100.0 | 0.0   | 0.0   | 11      |
| <i>flag::wrm-1<sub>T30AS46A</sub>; wrm-1(tm514); src-1(RNAi)</i>                  | 30.0  | 33.3  | 36.7  | 68      |
| <i>flag::wrm-1<sub>T30AS46A</sub>; wrm-1(tm514); src-1(RNAi); mom-4(ne1539ts)</i> | 75.0  | 16.7  | 8.3   | 36      |
| <i>flag::wrm-1<sub>T30AS46A</sub>; wrm-1(tm514); src-1(RNAi); wrm-1(RNAi)</i>     | 74.3  | 22.9  | 2.8   | 35      |
| <i>wrm-1*</i>                                                                     | 100.0 | 0.0   | 0.0   | 10      |
| <i>wrm-1*; src-1(RNAi)</i>                                                        | 68.0  | 24.0  | 0.0   | 25      |
| <i>wrm-1*; wrm-1(tm514)</i>                                                       | 100.0 | 0.0   | 0.0   | 30      |
| <i>wrm-1*; wrm-1(tm514); src-1(RNAi)</i>                                          | 58.9  | 38.5  | 2.6   | 39      |
| <i>wrm-1*<sub>T30AS46A</sub></i>                                                  | 100.0 | 0.0   | 0.0   | 10      |
| <i>wrm-1*<sub>T30AS46A</sub>; src-1(RNAi)</i>                                     | 23.0  | 38.5  | 38.5  | 26      |
| <i>wrm-1*<sub>T30AS46A</sub>; wrm-1(tm514)</i>                                    | 100.0 | 0.0   | 0.0   | 30      |
| <i>wrm-1*<sub>T30AS46A</sub>; wrm-1(tm514); src-1(RNAi)</i>                       | 40.6  | 35.1  | 24.3  | 37      |
| <i>src-1(RNAi); mom-2(RNAi)</i>                                                   | 0.0   | 6.5   | 93.5  | 92      |
| <i>src-1(RNAi); mom-2(ne834ts)</i>                                                | 15.2  | 15.2  | 69.6  | 33      |
| <i>src-1(RNAi); mom-2(RNAi); mom-4(ne1539ts)</i>                                  | 68.2  | 13.6  | 18.2  | 22      |
| <i>src-1(RNAi); mom-2(RNAi); lit-1(ne1991ts)</i>                                  | 28.1  | 46.9  | 25.0  | 32      |
| <i>src-1(RNAi); mom-2(ne834ts); wrm-1(RNAi)</i>                                   | 64.3  | 14.3  | 21.4  | 28      |
| <i>mes-1(bn74); mom-2(ne834ts)</i>                                                | 19.2  | 23.1  | 57.7  | 26      |
| <i>mes-1(bn74); mom-2(RNAi); mom-4(ne1539ts)</i>                                  | 60.7  | 21.4  | 17.9  | 28      |
| <i>mes-1(bn74); mom-2(RNAi); lit-1(ne1991ts)</i>                                  | 65.6  | 18.8  | 15.6  | 32      |
| <i>mes-1(bn74); mom-2(ne834ts); wrm-1(RNAi)</i>                                   | 76.9  | 9.6   | 13.5  | 52      |

Orientation of EMS mitotic spindle was measured as explained in Fig. 2 and *Materials and Methods*. This table compiles data from Figs. 2 and 4, part of Fig. 5, and additional genetic combinations and controls. Details on the scoring method are in *Materials and Methods*. Phenotypes of some relevant single and double mutants were described in ref. 1.

\*Strains expressing *wrm-1* transgenes without an epitope tag (*wrm-1\** and *wrm-1\*<sub>T30AS46A</sub>*).

1. Bei Y, et al. (2002) SRC-1 and Wnt signaling act together to specify endoderm and to control cleavage orientation in early *C. elegans* embryos. *Dev Cell* 3(1):113–125.

**Table S2. Statistical analysis of the EMS mitotic spindle orientations (multiple-comparisons ANOVA with Bonferroni posthoc analysis)**

| Category of EMS cell division | RNAi               | Population 1                     | Population 2                                        | P value |
|-------------------------------|--------------------|----------------------------------|-----------------------------------------------------|---------|
| C                             | <i>src-1</i>       | WT                               | <i>flag::wrm-1; wrm-1(tm514)</i>                    | 0.597   |
| C                             | <i>src-1</i>       | WT                               | <i>flag::wrm-1<sub>T30AS46A</sub>; wrm-1(tm514)</i> | 0.003   |
| C                             | <i>src-1</i>       | <i>flag::wrm-1; wrm-1(tm514)</i> | <i>flag::wrm-1<sub>T30AS46A</sub>; wrm-1(tm514)</i> | <0.001  |
| C                             | <i>wrm-1</i>       | WT                               | <i>flag::wrm-1; wrm-1(tm514)</i>                    | 1.000   |
| C                             | <i>wrm-1</i>       | WT                               | <i>flag::wrm-1<sub>T30AS46A</sub>; wrm-1(tm514)</i> | 1.000   |
| C                             | <i>wrm-1</i>       | <i>flag::wrm-1; wrm-1(tm514)</i> | <i>flag::wrm-1<sub>T30AS46A</sub>; wrm-1(tm514)</i> | 1.000   |
| C                             | <i>src-1 wrm-1</i> | WT                               | <i>flag::wrm-1; wrm-1(tm514)</i>                    | 0.001   |
| C                             | <i>src-1 wrm-1</i> | WT                               | <i>flag::wrm-1<sub>T30AS46A</sub>; wrm-1(tm514)</i> | 0.045   |
| C                             | <i>src-1 wrm-1</i> | <i>flag::wrm-1; wrm-1(tm514)</i> | <i>flag::wrm-1<sub>T30AS46A</sub>; wrm-1(tm514)</i> | 0.011   |
| B                             | <i>src-1</i>       | WT                               | <i>flag::wrm-1; wrm-1(tm514)</i>                    | 0.910   |
| B                             | <i>src-1</i>       | WT                               | <i>flag::wrm-1<sub>T30AS46A</sub>; wrm-1(tm514)</i> | 0.117   |
| B                             | <i>src-1</i>       | <i>flag::wrm-1; wrm-1(tm514)</i> | <i>flag::wrm-1<sub>T30AS46A</sub>; wrm-1(tm514)</i> | 0.271   |
| B                             | <i>wrm-1</i>       | WT                               | <i>flag::wrm-1; wrm-1(tm514)</i>                    | 1.000   |
| B                             | <i>wrm-1</i>       | WT                               | <i>flag::wrm-1<sub>T30AS46A</sub>; wrm-1(tm514)</i> | 1.000   |
| B                             | <i>wrm-1</i>       | <i>flag::wrm-1; wrm-1(tm514)</i> | <i>flag::wrm-1<sub>T30AS46A</sub>; wrm-1(tm514)</i> | 1.000   |
| B                             | <i>src-1 wrm-1</i> | WT                               | <i>flag::wrm-1; wrm-1(tm514)</i>                    | 0.185   |
| B                             | <i>src-1 wrm-1</i> | WT                               | <i>flag::wrm-1<sub>T30AS46A</sub>; wrm-1(tm514)</i> | 0.164   |
| B                             | <i>src-1 wrm-1</i> | <i>flag::wrm-1; wrm-1(tm514)</i> | <i>flag::wrm-1<sub>T30AS46A</sub>; wrm-1(tm514)</i> | 0.466   |

P values are reported for multiple comparisons of categories B and C between the strains specified. We used Bonferroni posthoc testing to correct for multiple comparisons.
